# Supplementary material for: Clinicopathological and Targeted Exome Gene Features of a Patient with Metastatic Acinic Cell Carcinoma of the Parotid Gland Harboring an ARID2 Nonsense Mutation and CDKN2A/B Deletion
Source: Hindawi journal article supplement (doi:10.1155/2015/893694), 2015-01-01
Supplement: f1 [file 893694.f1.pdf]

Clinicopathological and Targeted Exome Gene Features of a Patient with Metastatic Acinic Cell Carcinoma of the Parotid Gland Harboring a ARID2 Nonsense Mutation and CDKN2A/B Deletion

Supplementary Materials

**Table S1| Sequencing specifications.**

|                                   | <b>Base Substitutions</b> | <b>Indels</b>          | <b>Copy Number Alterations</b>                            | <b>Rearrangements</b>                                             |
|-----------------------------------|---------------------------|------------------------|-----------------------------------------------------------|-------------------------------------------------------------------|
| Sensitivity                       | >99%<br>MAF $\geq$ 5%     | >97%<br>MAF $\geq$ 10% | $\geq$ 95%<br>CN $\geq$ 8 or 0<br>$\geq$ 30% tumor nuclei | $\geq$ 90%**<br>>99% for ALK fusion***<br>$\geq$ 20% tumor nuclei |
| Specificity (PPV)                 | >99%                      | >99%                   | >99%                                                      |                                                                   |
| Typical median depth of coverage* | 500****                   |                        |                                                           |                                                                   |

\*Each covered read is of a unique DNA fragment to enable detection of alterations at low frequency [57]. \*\*Based on analysis of coverage and re-arrangement structure in the COSMIC database for solid tumor fusion genes where alteration prevalence could be established, complemented by detection of exemplar rearrangements in cell line titration experiments [57]. \*\*\*Based on ALK re-arrangement concordance analysis vs. a standard clinical FISH assay [57]. \*\*\*\*[9]. MAF, mutant allele frequency; CN, copy number; PPV, Positive Predictive Value.

**Table S2|Genes assayed by FoundationOne®.**

|                 |        |        |                 |                 |          |          |        |
|-----------------|--------|--------|-----------------|-----------------|----------|----------|--------|
| ABL1            | CCND2  | ERBB2  | GATA6           | KMT2C (MLL3)    | NTRK2    | RNF43    | TP53   |
| ABL2            | CCND3  | ERBB3  | GID4 (C17orf39) | KMT2D (MLL2)    | NTRK3    | ROS1     | TSC1   |
| ACVR1B          | CCNE1  | ERBB4  | GLI1            | KRAS            | NUP93    | RPTOR    | TSC2   |
| AKT1            | CD274  | ERG    | GNA11           | LMO1            | PAK3     | RUNX1    | TSHR   |
| AKT2            | CD79A  | ERRFI1 | GNA13           | LRP1B           | PALB2    | RUNX1T1  | U2AF1  |
| AKT3            | CD79B  | ESR1   | GNAQ            | LYN             | PARK2    | SDHA     | VEGFA  |
| ALK             | CDC73  | EZH2   | GNAS            | LZTR1           | PAX5     | SDHB     | VHL    |
| AMER1 (FAM123B) | CDH1   | FAM46C | GPR124          | MAGI2           | PBRM1    | SDHC     | WISP3  |
| APC             | CDK12  | FANCA  | GRIN2A          | MAP2K1          | PDCD1LG2 | SDHD     | WT1    |
| AR              | CDK4   | FANCC  | GRM3            | MAP2K2          | PDGFRA   | SETD2    | XPO1   |
| ARAF            | CDK6   | FANCD2 | GSK3B           | MAP2K4          | PDGFRB   | SF3B1    | ZBTB2  |
| ARFRP1          | CDK8   | FANCE  | H3F3A           | MAP3K1          | PDK1     | SLIT2    | ZNF217 |
| ARID1A          | CDKN1A | FANCF  | HGF             | MCL1            | PIK3C2B  | SMAD2    | ZNF703 |
| ARID1B          | CDKN1B | FANCG  | HNF1A           | MDM2            | PIK3CA   | SMAD3    |        |
| ARID2           | CDKN2A | FANCL  | HRAS            | MDM4            | PIK3CB   | SMAD4    |        |
| ASXL1           | CDKN2B | FAS    | HSD3B1          | MED12           | PIK3CG   | SMARCA4  |        |
| ATM             | CDKN2C | FAT1   | HSP90AA1        | MEF2B           | PIK3R1   | SMARCB1  |        |
| ATR             | CEBPA  | FBXW7  | IDH1            | MEN1            | PIK3R2   | SMO      |        |
| ATRX            | CHD2   | FGF10  | IDH2            | MET             | PLCG2    | SNCAIP   |        |
| AURKA           | CHD4   | FGF14  | IGF1R           | MITF            | PMS2     | SOCS1    |        |
| AURKB           | CHEK1  | FGF19  | IGF2            | MLH1            | POLD1    | SOX10    |        |
| AXIN1           | CHEK2  | FGF23  | IKBKE           | MPL             | POLE     | SOX2     |        |
| AXL             | CIC    | FGF3   | IKZF1           | MRE11A          | PPP2R1A  | SOX9     |        |
| BAP1            | CREBBP | FGF4   | IL7R            | MSH2            | PRDM1    | SPEN     |        |
| BARD1           | CRKL   | FGF6   | INHBA           | MSH6            | PREX2    | SPOP     |        |
| BCL2            | CRLF2  | FGFR1  | INPP4B          | MTOR            | PRKAR1A  | SPTA1    |        |
| BCL2L1          | CSF1R  | FGFR2  | IRF2            | MUTYH           | PRKCI    | SRC      |        |
| BCL2L2          | CTCF   | FGFR3  | IRF4            | MYC             | PRKDC    | STAG2    |        |
| BCOR            | CTNNA1 | FGFR4  | IRS2            | MYCL<br>(MYCL1) | PRSS8    | STAT3    |        |
| BCORL1          | CTNNB1 | FH     | JAK1            | MYCN            | PTCH1    | STAT4    |        |
| BLM             | CUL3   | FLCN   | JAK2            | MYD88           | PTEN     | STK11    |        |
| BRAF            | CYLD   | FLT1   | JAK3            | NF1             | PTPN11   | SUFU     |        |
| BRCA1           | DAXX   | FLT1   | JUN             | NF2             | QKI      | SYK      |        |
| BRCA2           | DDR2   | FLT4   | KAT6A (MYST3)   | NFE2L2          | RAC1     | TAF1     |        |
| BRD4            | DICER1 | FOXL2  | KDM5A           | NFKBIA          | RAD50    | TBX3     |        |
| BRIP1           | DNMT3A | FOXP1  | KDM5C           | NKX2-1          | RAD51    | TERC     |        |
| BTG1            | DOT1L  | FRS2   | KDM6A           | NOTCH1          | RAF1     | TERT*    |        |
| BTK             | EGFR   | FUBP1  | KDR             | NOTCH2          | RANBP2   | TET2     |        |
| C11orf30 (EMSY) | EP300  | GABRA6 | KEAP1           | NOTCH3          | RARA     | TGFBR2   |        |
| CARD11          | EPHA3  | GATA1  | KEL             | NPM1            | RB1      | TNFAIP3  |        |
| CBFB            | EPHA5  | GATA2  | KIT             | NRAS            | RBM10    | TNFRSF14 |        |
| CBL             | EPHA7  | GATA3  | KLHL6           | NSD1            | RET      | TOP1     |        |
| CCND1           | EPHB1  | GATA4  | KMT2A (MLL)     | NTRK1           | RICTOR   | TOP2A    |        |

Assay interrogated the entire coding sequence of 315 cancer-implicated genes that are

druggable targets (validated or in clinical trials), established oncogenic drivers and/or somatically compromised in solid tumors. \*Promoter only

**Table S3| Select rearrangements assayed by FoundationOne®.**

---

|      |       |      |       |        |        |         |
|------|-------|------|-------|--------|--------|---------|
| ALK  | BRCA1 | ETV1 | FGFR2 | MYB    | NTRK2  | RET     |
| BCL2 | BRCA2 | ETV4 | FGFR3 | MYC    | PDGFRA | ROS1    |
| BCR  | BRD4  | ETV5 | KIT   | NOTCH2 | RAF1   | TMPRSS2 |
| BRAF | EGFR  | ETV6 | MSH2  | NTRK1  | RARA   |         |

---

Assay interrogated selected introns from 28 genes structurally rearranged in solid tumors.
